# Supplementary material for: Katacine Is a New Ligand of CLEC-2 that Acts as a Platelet Agonist
Source: PubMed Central journal article supplement — Thromb Haemost. 2022 Jun 28;122(8):1361–8. doi: 10.1055/a-1772-1069 (PMC9393086; doi:10.1055/a-1772-1069), 2022-06-28
Supplement: 10-1055-a-1772-1069-s210571.pdf [file 10-1055-a-1772-1069-s210571.pdf]

## SUPPLEMENTARY INFORMATION

### **Katacine is a new ligand of CLEC-2 that acts as a platelet agonist**

Luis A. Morán<sup>1,2</sup>, Ying Di<sup>2</sup>, Marcin A. Sowa<sup>1,3</sup>, Lidia Hermida-Nogueira<sup>1</sup>, María N Barrachina<sup>1†</sup>, Eleya Martin<sup>2</sup>, Joanne C. Clark<sup>2</sup>, Todd H. Mize<sup>4</sup>, Johannes A. Eble<sup>5</sup>, David Moreira<sup>1</sup>, Alice Y. Pollitt<sup>3</sup>, María I. Loza<sup>1</sup>, Eduardo Domínguez<sup>1</sup>, Steve P. Watson<sup>2</sup>, Ángel García<sup>1</sup>

<sup>1</sup>Center for Research in Molecular Medicine and Chronic Diseases (CIMUS), Universidad de Santiago de Compostela, and Instituto de Investigación Sanitaria (IDIS), Santiago de Compostela, Spain

<sup>2</sup>Institute of Cardiovascular Sciences, College of Medical and Dental Sciences, University of Birmingham, UK

<sup>3</sup>Institute for Cardiovascular and Metabolic Research (ICMR), School of Biological Sciences, University of Reading, Reading, UK

<sup>4</sup>Advanced Mass Spectrometry Facility, Biosciences, College of Life and Environmental Sciences, University of Birmingham, UK

<sup>5</sup>Institute for Physiological Chemistry & Pathobiochemistry, University of Münster, Germany

†Current affiliation: Vascular Biology Program, Boston Children's Hospital, Harvard Medical School, Boston, USA

## **Supplementary Methods**

### **Mouse platelet isolation**

Blood was taken from anaesthetised wild type (WT) C57BL/6 mice into 10% ACD washed platelets, PRP was obtained by centrifugation at 200 x g for 20 minutes, followed by addition of 0.2 µg/ml prostacyclin and centrifugation at 1000 x g for 10 min. Platelets were resuspended in Tyrode's buffer (134 mM NaCl, 0.34 mM Na<sub>2</sub>HPO<sub>4</sub>, 2.9 mM KCl, 12 mM NaHCO<sub>3</sub>, 20 mM HEPES, 5mM glucose, 1 mM MgCl<sub>2</sub>, pH 7.3), followed by an additional centrifugation step as above. Platelets were resuspended and allowed to rest for 30 min at room temperature.

**Supplementary Table 1.** Detailed information of top compounds identified during ALPHA screening as a disruptor of CLEC-2 and podoplanin interaction and ranked according to their potency showed on the concentration-response curves on Figure 1.

| Label | Name                                                                    | MW     | IC50<br>( $\mu$ M) | SMILE CODE                                                                                                                                                                        |
|-------|-------------------------------------------------------------------------|--------|--------------------|-----------------------------------------------------------------------------------------------------------------------------------------------------------------------------------|
| A     | Sennoside A                                                             | 862.74 | 1.3                | <chem>OC[C@H]([C@H]([C@@H]([C@H]1O)O)O)[C@@H]1Oc1cccc([C@H]([C@H](c2cccc(O[C@H]([C@@H]([C@H]3O)O)O[C@H](CO)[C@H]3O)c22)c3cc(C(O)=O)cc(O)c3C2=O)c2c3c(O)cc(C(O)=O)c2)c1C3=O</chem> |
| B     | Katacine                                                                | 914.77 | 2.7                | <chem>O[C@H]1[C@@H](c(cc2O)cc(O)c2O)Oc2c([C@H]([C@H]3O)c(c(O)cc(O)c4[C@H]([C@H]5O)c(c(O)cc(O)c6)c6O[C@@H]5c(cc5O)cc(O)c5O)c4O[C@H]3c(cc3O)cc(O)c3O)c(O)cc(O)c2C1</chem>           |
| C     | 4-{{4-(pyridin-2-yl)-1,3-thiazol-2-yl}amino}phenol                      | 269.32 | 2.9                | <chem>Oc(cc1)ccc1Nc1nc(-c2ncccc2)cs1</chem>                                                                                                                                       |
| D     | 6-dipyridin-2-ylpyrimidin-4-amine                                       | 357.41 | 5.3                | <chem>C(CNc1cc(-c2ncccc2)nc(-c2ncccc2)n1)Cn1cnc1</chem>                                                                                                                           |
| E     | N-allyl-6-phenyl-2-pyridin-2-ylpyrimidin-4-amine                        | 288.35 | 6.3                | <chem>C=CCNc1cc(-c2cccc2)nc(-c2ncccc2)n1</chem>                                                                                                                                   |
| F     | N'-[(E)-(3-ethoxy-2-hydroxyphenyl)methylidene]pyridine-2-carbohydrazide | 285.30 | 6.7                | <chem>CCOc1cccc(/C=N/NC(c2ncccc2)=O)c1O</chem>                                                                                                                                    |

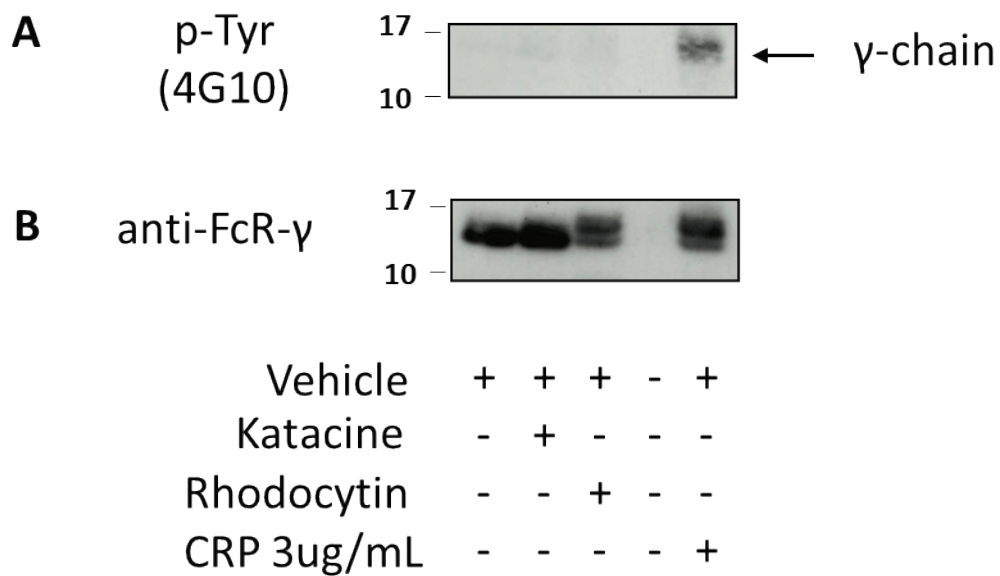

**Supplementary Figure 1. Katacine does not induce an increase in tyrosine phosphorylation levels of the FcR  $\gamma$ -chain in human platelets.** Representative immunoblots of platelet lysates ( $4 \times 10^8$ ) stimulated with DMSO 0.1% (negative control), 100 nM rhodocytin, 10  $\mu$ M katacine, or 3  $\mu$ g/mL CRP (positive control). Lysates were run by SDS-PAGE and transferred to a PDVF membrane and incubated against the anti-tyrosine antibody (4G10) (A). The same membrane was incubated against the anti-FcR antibody (B).

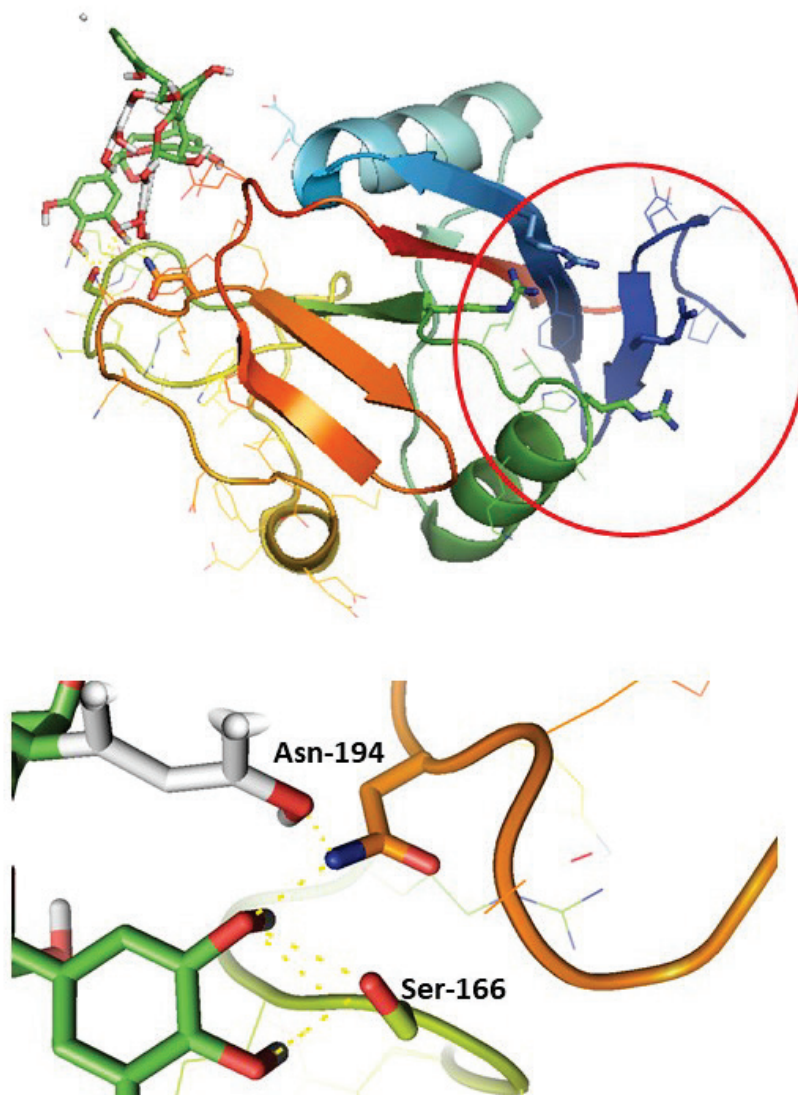

**Supplementary Figure 2.** Molecular docking suggested an additional highly scored binding site on CLEC-2 for katecine interaction on the opposite site to the canonical binding site reported for other ligands (enclosed in red circle). Autodock vina has predicted a binding energy of -6.9 kcal/mol for katecine binding on Ser-166 and Asn-194. This finding may indicate a potential allosteric binding site for CLEC-2, previously unreported.

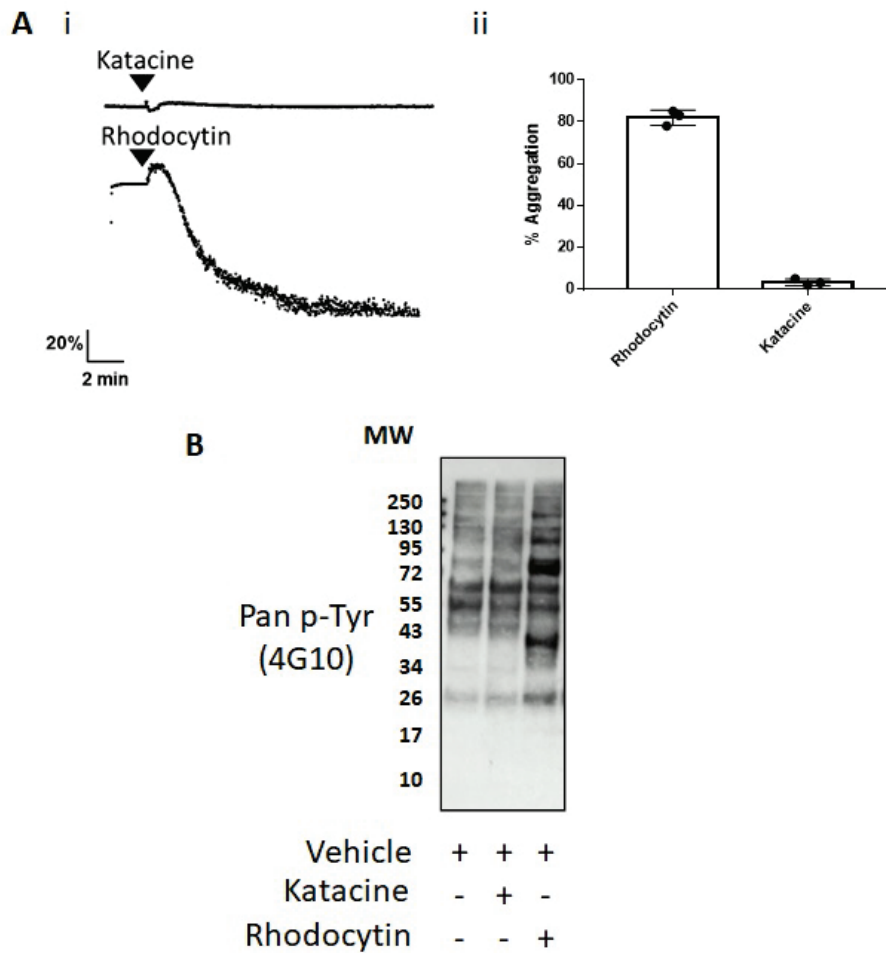

**Supplementary Figure 3. Katacine does not induce platelet aggregation or protein tyrosine phosphorylation in mouse platelets.** Ai) Representative traces of mouse washed platelets ( $2 \times 10^8$  platelets/mL) stimulated with  $10 \mu\text{M}$  katacine or  $100\text{nM}$  rhodocytin. Aii) Column chart representing the mean aggregation  $\pm$  SD of three independent experiments. B) Representative immunoblots of mouse platelet lysates ( $4 \times 10^8$  platelets/mL) stimulated with  $0.1\%$  DMSO (negative control),  $100 \text{ nM}$  rhodocytin (positive control) or  $10 \mu\text{M}$  katacine.
